# Supplementary material for: Gastrointestinal and Skin Safety Evaluation of Pirfenidone versus Nintedanib: An Analysis of Real-World Pharmacovigilance and Randomized Controlled Trials
Source: Research Square preprint supplement (doi:10.21203/rs.3.rs-7966320/v1), 2025-11-21
Supplement: Supplementary file 1 [file 7535d943dfb2d4674a503856.docx]

**﻿SUPPLEMENTARY MATERIALS**

[Table.S1. Search strategy 2](#_Toc212539500)

[Table.S2 Excluded studies with reasons 2](#_Toc212539501)

[**TABLE.S3 SIGNAL PROFILE OF PIREENIDONE AND NINTEDANIB BASED ON SOC AND PTS IN FAERS 3**](#_Toc212539502)

[Table.S4 Disproportionality analysis of gender and age based on Top 10 PTs for Gastrointestinal disorders and Skin and subcutaneous tissue disorders 3](#_Toc212539503)

[Table.S5 Disproportionality analysis of reporting region based on Top 10 PTs for Gastrointestinal disorders and Skin and subcutaneous tissue disorders. 7](#_Toc212539504)

[Table.S6. Baseline characteristics of 10 RCTs 10](#_Toc212539505)

[Table.S7 Patient demographics and clinical characteristics of RCTs 12](#_Toc212539506)

[Fig.S1. Literature screening process and results. 14](#_Toc212539507)

[Fig. S2. Summary of risk of bias appraisal of 10 RCTs. 15](#_Toc212539508)

[Fig. S3. Meta-analysis results of the change from baseline in FVC of subgroup analysis of Pirfenidone and Nintedanib 15](#_Toc212539509)

# Table.S1. Search strategy

| **﻿Search strategy for PubMed, Embase, and Cochrane Library databases** | | | |
| --- | --- | --- | --- |
| ﻿Patient | #1 | (Idiopathic pulmonary fibrosis[Title/Abstract]) OR (IPF[Title/Abstract]) | |
| ﻿Intervention | #2 | (((((((Nintedanib[Title/Abstract]) OR (Ofev[Title/Abstract])) OR (Vargatef[Title/Abstract])) OR (BIBF1120[Title/Abstract])) OR (BIBF-1120[Title/Abstract])) OR (pirfenidone[Title/Abstract])) OR (Esbriet[Title/Abstract])) OR (Pirespa[Title/Abstract]) | |
| ﻿Study type | #3 | ﻿ (((((Randomized Controlled Trial[Title/Abstract]) OR (Controlled Cinical Trial[Title/Abstract])) OR (Randomized[Title/Abstract])) OR (Placebo[Title/Abstract])) OR (Randomly[Title/Abstract])) OR (Trial[Title/Abstract]) | |
| Language | #4 | English [language] | |
| ﻿Search strategy | #1 AND #2 AND #3 AND #4 | | |
| ﻿**Search terms in ClinicalTrials.gov** | | | |
| 1 | ﻿Patient | | Idiopathic Pulmonary Fibrosis |
| 2 | ﻿Intervention | | “nintedanib” OR “pirfenidone” 13 and 22 |
| 3 | ﻿Study phase | | ﻿Phase II and phase III clinical trial |
| 4 | ﻿Study status | | ﻿Completed and with results |

Studies With Results | Interventional Studies || Phase 2, 3

# Table.S2 Excluded studies with reasons

| **Author, year/**  **NCT number** | **Study** | **Intervention** | **Reason for exclusion** |
| --- | --- | --- | --- |
| Sakamoto, 2021 | / | Pirfenidone + N-Acetylcysteine/Pirfenidone | Open label study，no placebo control |
| Prasse, 2019 | INMARK | Nintedanib /Placebo | Overlap with Maher, 2019 |
| Pfeifer, 2019 | INSTAGE | Nintedanib+Sildenafil / Nintedanib | drug combination，no placebo control |
| Maher, 2019 | INMARK | Nintedanib /Placebo | Open label Phase 4 study |
| Jenkins, 2019 | INMARK | Nintedanib / Placebo | Overlap with Maher, 2019 |
| EUCTR2019-004326-19-FR, 2019 | / | Pirfenidone/Nintedanib | Open label study，no placebo control |
| Maher, 2018 | INMARK | Nintedanib /Placebo | Overlap with Maher, 2019 |
| Kato, 2018 | / | Nintedanib+Prednisolone /nintedanib | Open label study，no placebo control |
| Kondoh, 2017 | FITNESS | Nintedanib+Pulmonary rehabilitation program/Nintedanib | Open label study，no placebo control |
| Irct2017031333044N, 2017 | / | Pirfenidone/Placebo | Clinical trial protocol |
| EUCTR2015-003148-38-PL, 2016 | INSTAGE | Nintedanib+Sildenafil / Nintedanib | Overlap with Pfeifer, 2019 |
| EUCTR2015-002619-14-DE, 2016 | INSTAGE | Nintedanib+Sildenafil / Nintedanib | Overlap with Pfeifer, 2019 |
| Behr, 2016 | PANORAMA | Pirfenidone+Acetylcysteine/Pirfenidone+Palcebo | drug combination，no placebo control |
| UMIN000019436, 2015 | / | Nintedanib + Pirfenidone / Nintedanib | drug combination，no placebo control |
| Ogura, 2015 | / | Nintedanib+Pirfenidone / Nintedanib | drug combination，no placebo control |
| NCT02551068 | / | 60% Oxygen/ Standard of Care | Not relevant |
| Huang, 2015 (Medicine) | / | Pirfenidone/Placebo | Overlap with Huang, 2015 (American Journal of Respiratory and Critical Care Medicine) |
| EUCTR2015-000640-42-DE, 2015 | / | Nintedanib+Pirfenidone / Nintedanib | Open label Phase 4 study |
| Behr, 2015 | PANORAMA | Pirfenidone+Acetylcysteine/Pirfenidone+Placebo | Overlap with Behr, 2016 |
| Richeldi, 2014 | INPULSIS | Nintedanib / Placebo | Overlap with NCT01335464, 2014 and NCT01335477,2014 |
| Richeldi, 2014 | INPULSIS | Nintedanib / Placebo | Overlap with NCT01335464, 2014 and NCT01335477,2014 |
| Richeldi, 2014 | INPULSIS | Nintedanib / Placebo | Overlap with NCT01335464, 2014 and NCT01335477,2014 |
| Richeldi, 2014 | INPULSIS | Nintedanib / Placebo | Clinical trial protocol |
| Iwasawa,2014 | \ | Nintedanib / Control | Open label studies |
| Talmadge, 2014 | ASCEND | Pirfenidone/ Placebo | Overlap with King，2014 |
| NCT01979952，2013 | / | Nintedanib/Placebo | Overlap with Lancaster, 2020 |
| Huang, 2013 | / | Pirfenidone | Open label studies |
| NCT01619085, 2012 | / | Nintedanib | Single arm study |
| Taniguchi, 2011 | / | Pirfenidone/Placebo | Overlap with Taniguchi, 2010 |
| Richeldi, 2011（European Respiratory Journal） | TOMORROW | Nintedanib/Placebo | Overlap with Richeldi, 2011（New England Journal of Medicine） |
| Richeldi, 2011(American Journal of Respiratory and Critical Care Medicine)-1 | TOMORROW | Nintedanib/Placebo | Overlap with Richeldi, 2011（New England Journal of Medicine） |
| Richeldi, 2011(American Journal of Respiratory and Critical Care Medicine)-2 | TOMORROW | Nintedanib/Placebo | Overlap with Richeldi, 2011（New England Journal of Medicine） |
| Per, 2011 | / | Pirfenidone/Placebo | Clinical trial protocol |
| NCT01504334, 2011 | / | Pirfenidone/Placebo | Overlap with Huang, 2015 |
| NCT01366209, 2011 | ASCEND | Pirfenidone/Placebo | Overlap with King，2014 |
| EUCTR2010-024251-87-IT, 2011 | INPULSIS | Nintedanib/Placebo | Overlap with NCT01335464 |
| Costabel, 2011 | TOMORROW | Nintedanib/Placebo | Overlap with Richeldi, 2011（New England Journal of Medicine） |
| Noble, 2009 | / | Pirfenidone/Placebo | Overlap with Noble, 2011 |
| NCT00514683,2007 | TOMORROW | Nintedanib/Placebo | Overlap with Richeldi, 2011（New England Journal of Medicine） |
| EUCTR2006-002875-42-CZ, 2007 | TOMORROW | Nintedanib/Placebo | Overlap with Richeldi, 2011（New England Journal of Medicine） |
| NCT00287729,2007 | CAPACITY 004 | Pirfenidone/Placebo | Overlap with Noble, 2011 |
| NCT00287716,2006 | CAPACITY 006 | Pirfenidone/Placebo | Overlap with Noble, 2011 |
| EUCTR2006-000252-41-IT, 2006 | CAPACITY 004 | Pirfenidone/Placebo | Overlap with Noble, 2011 |
| EUCTR2006-000138-11-ES, 2006 | CAPACITY 006 | Pirfenidone/Placebo | Overlap with Noble, 2011 |
| Azuma, 2002 | / | Pirfenidone/Placebo | Overlap with Azuma, 2005 |
| NCT01136174, 2010 | / | [Nintedanib/Placebo](https://clinicaltrials.gov/show/) | The duration of intervention was less than six months |
| UMIN000026376， 2017 | / | Nintedanib/Placebo | Open label Phase 4 study |

Table.S3 Signal profile of Pirfenidone and Nintedanib based on SOC and PTs in FAERS

|  | Pirfenidone | |  | Nintedanib | |
| --- | --- | --- | --- | --- | --- |
| SOC/PTs | n | ROR (95% CI) |  | n | ROR (95% CI) |
| **Gastrointestinal disorders** |  |  | **Gastrointestinal disorders** |  |  |
| dyspepsia | 808 | 8.381(7.807-8.996) | faeces soft | 117 | 38.345(31.815-46.215) |
| gastric disorder | 457 | 8.227(7.492-9.035) | large intestinal haemorrhage | 19 | 20.706(13.121-32.677) |
| abdominal discomfort | 1171 | 5.843(5.508-6.199) | diarrhoea haemorrhagic | 65 | 18.931(14.79-24.232) |
| **General disorders and administration site conditions** |  |  | **General disorders and administration site conditions** | |  |
| fibrosis | 33 | 12.088(8.534-17.12) | mucosal discolouration | 5 | 17.205(7.088-41.762) |
| death | 4955 | 5.043(4.89-5.202) | ulcer haemorrhage | 29 | 10.908(7.557-15.746) |
| early satiety | 5 | 4.097(1.695-9.902) | secretion discharge | 52 | 9.903(7.528-13.027) |
| **Infections and infestations** |  |  | **Infections and infestations** |  |  |
| campylobacter gastroenteritis | 5 | 8.66(3.56-21.067) | diverticulitis intestinal haemorrhagic | 7 | 46.266(21.558-99.289) |
| pneumonia streptococcal | 4 | 5.256(1.956-14.122) | post procedural pneumonia | 4 | 38.29(14.016-104.604) |
| enteritis infectious | 9 | 4.335(2.245-8.37) | pulmonary sepsis | 10 | 17.213(9.193-32.228) |
|  |  |  |  |  |  |
| **Injury, poisoning and procedural complications** |  |  | **Injury, poisoning and procedural complications** |  |  |
| sunburn | 265 | 40.727(35.809-46.319) | keratorhexis | 8 | 186.733(86.03-405.314) |
| heavy exposure to ultraviolet light | 6 | 26.13(11.35-60.155) | wrong dose | 12 | 7.502(4.247-13.252) |
| asbestosis | 4 | 20.666(7.506-56.897) | traumatic lung injury | 6 | 6.171(2.763-13.785) |
| **Investigations** |  |  | **Investigations** |  |  |
| forced vital capacity abnormal | 4 | 93.793(30.58-287.674) | transferrin increased | 5 | 233.354(85.471-637.102) |
| lung diffusion test decreased | 42 | 72.431(51.729-101.418) | oxygen saturation increased | 24 | 152.136(98.051-236.052) |
| forced vital capacity decreased | 47 | 48.806(35.863-66.419) | base excess increased | 4 | 142.222(48.811-414.394) |
| **Metabolism and nutrition disorders** |  |  | **Metabolism and nutrition disorders** |  |  |
| food aversion | 16 | 11.988(7.273-19.759) | diet refusal | 8 | 35.781(17.598-72.749) |
| decreased appetite | 2217 | 9.806(9.384-10.247) | food aversion | 19 | 35.424(22.35-56.146) |
| appetite disorder | 25 | 3.645(2.457-5.407) | abnormal loss of weight | 54 | 20.513(15.644-26.898) |
|  |  |  |  |  |  |
| **Musculoskeletal and connective tissue disorders** |  |  | **Musculoskeletal and connective tissue disorders** |  |  |
| clubbing | 4 | 9.168(3.391-24.788) | systemic scleroderma | 16 | 43.33(26.167-71.751) |
| limb mass | 9 | 2.679(1.39-5.165) | clubbing | 6 | 34.734(15.317-78.768) |
| muscle fatigue | 11 | 2.464(1.361-4.46) | lumbar spinal stenosis | 7 | 8.514(4.041-17.939) |
|  |  |  |  |  |  |
| **Neoplasms benign, malignant and unspecified (incl cysts and polyps)** |  |  | **Neoplasms benign, malignant and unspecified (incl cysts and polyps)** |  |  |
| small cell lung cancer | 13 | 7.521(4.338-13.042) | squamous cell carcinoma of lung | 8 | 20.676(10.239-41.75) |
| bronchial carcinoma | 5 | 7.293(3.004-17.706) | lung carcinoma cell type unspecified recurrent | 5 | 19.245(7.919-46.769) |
| lung neoplasm | 11 | 4.311(2.377-7.817) | small cell lung cancer | 13 | 18.503(10.669-32.089) |
| **Nervous system disorders** |  |  | **Nervous system disorders** |  |  |
| hypogeusia | 14 | 7.623(4.485-12.957) | inability to crawl | 7 | 261.403(110.511-618.321) |
| ageusia | 153 | 6.156(5.244-7.228) | carotid artery disease | 4 | 11.228(4.182-30.141) |
| parosmia | 30 | 4.182(2.917-5.998) | taste disorder | 88 | 9.958(8.063-12.299) |
| **Psychiatric disorders** |  |  | **Psychiatric disorders** |  |  |
| borderline personality disorder | 6 | 7.466(3.321-16.782) | laziness | 4 | 4.206(1.574-11.24) |
| eating disorder | 81 | 3.136(2.519-3.905) | near death experience | 8 | 4.193(2.092-8.402) |
| laziness | 7 | 3.01(1.429-6.337) | eating disorder | 43 | 4.086(3.026-5.517) |
| **Renal and urinary disorders** |  |  | **Renal and urinary disorders** |  |  |
| bladder fibrosis | 4 | 101.609(32.768-315.073) | urinary bladder haemorrhage | 14 | 14.53(8.559-24.667) |
| bladder irritation | 4 | 5.517(2.052-14.832) | calculus bladder | 6 | 10.23(4.57-22.9) |
| chromaturia | 77 | 3.429(2.739-4.294) | chromaturia | 76 | 8.495(6.771-10.658) |
| **Respiratory, thoracic and mediastinal disorders** |  |  | **Respiratory, thoracic and mediastinal disorders** |  |  |
| idiopathic pulmonary fibrosis | 238 | 53.207(46.343-61.088) | idiopathic pulmonary fibrosis | 906 | 1048.533(948.333-1159.32) |
| pulmonary artery dilatation | 12 | 28.364(15.697-51.253) | cough decreased | 12 | 358.657(180.149-714.045) |
| sputum increased | 41 | 23.523(17.117-32.326) | chronic respiratory failure | 23 | 60.147(39.314-92.02) |
|  |  |  |  |  |  |
| **Skin and subcutaneous tissue disorders** |  |  | **Skin and subcutaneous tissue disorders** |  |  |
| photosensitivity reaction | 533 | 30.332(27.729-33.181) | ephelides | 5 | 22.766(9.349-55.437) |
| solar dermatitis | 9 | 27.439(13.871-54.281) | solar lentigo | 10 | 19.505(10.408-36.554) |
| diabetic ulcer | 8 | 8.184(4.055-16.519) | subcutaneous emphysema | 6 | 14.595(6.505-32.748) |
| **Surgical and medical procedures** |  |  | **Surgical and medical procedures** |  |  |
| circumcision | 5 | 46.188(18.03-118.32) | lung transplant | 113 | 55.937(46.165-67.778) |
| lung transplant | 40 | 7.563(5.525-10.352) | large intestinal polypectomy | 4 | 46.666(16.991-128.17) |
| oxygen therapy | 12 | 3.847(2.177-6.799) | lung lobectomy | 6 | 44.808(19.655-102.146) |
| **Vascular disorders** |  |  | **Vascular disorders** |  |  |
| aortic arteriosclerosis | 11 | 5.884(3.24-10.686) | bloody discharge | 6 | 11.885(5.304-26.629) |
| superior vena cava syndrome | 4 | 5.698(2.119-15.321) | jugular vein thrombosis | 4 | 7.737(2.889-20.724) |
| aortic dilatation | 5 | 5.563(2.297-13.472) | aortic arteriosclerosis | 5 | 6.561(2.72-15.828) |
| **Cardiac disorders** |  |  | **Cardiac disorders** |  |  |
| aortic arteriosclerosis | 11 | 5.884(3.24-10.686) | cardiac ventricular thrombosis | 5 | 9.774(4.044-23.621) |
| superior vena cava syndrome | 4 | 5.698(2.119-15.321) | right ventricular failure | 15 | 4.957(2.982-8.239) |
| aortic dilatation | 5 | 5.563(2.297-13.472) | atrioventricular block | 16 | 4.868(2.977-7.962) |

# Table.S4 Disproportionality analysis of gender and age based on Top 10 PTs for Gastrointestinal disorders and Skin and subcutaneous tissue disorders

| **Pirfenidone** | **Gender** | | | | **Age** | | | | | |
| --- | --- | --- | --- | --- | --- | --- | --- | --- | --- | --- |
| **Gastrointestinal disorders** | **male** | **ROR (95% CI)** | **female** | **ROR (95% CI)** | **≤18** | **ROR (95% CI)** | **18<n<65** | **ROR (95% CI)** | **≥65** | **ROR (95% CI)** |
| dyspepsia | 449 | 9.273(8.423-10.209) | 331 | 8.171(7.316-9.126) | \ | \ | 54 | 9.793(7.452-12.87) | 201 | 7.22(6.262-8.324) |
| gastric disorder | 248 | 11.145(9.793-12.683) | 198 | 9.891(8.58-11.403) | \ | \ | 15 | 6.961(4.18-11.593) | 104 | 8.975(7.366-10.935) |
| abdominal discomfort | 709 | 7.011(6.494-7.57) | 439 | 5.149(4.677-5.67) | \ | \ | 48 | 4.497(3.369-6.002) | 263 | 4.713(4.162-5.336) |
| gastrooesophageal reflux disease | 224 | 6.144(5.373-7.026) | 207 | 6.895(6.002-7.921) | \ | \ | 22 | 5.89(3.862-8.984) | 107 | 5.053(4.166-6.129) |
| chapped lips | 9 | 4.359(2.249-8.448) | 13 | 7.292(4.214-12.619) | \ | \ | \ | \ | 2 | 1.479(0.368-5.946) |
| oesophageal pain | 7 | 5.593(2.635-11.874) | 10 | 6.366(3.409-11.888) | \ | \ | 2 | 10.317(2.567-41.456) | 6 | 5.785(2.57-13.023) |
| defaecation disorder | 2 | 3.649(0.899-14.807) | 2 | 6.963(1.722-28.148) | \ | \ | \ | \ | 2 | 8.404(2.045-34.547) |
| eructation | 59 | 6.451(4.972-8.369) | 20 | 2.978(1.917-4.625) | \ | \ | 4 | 5.086(1.903-13.59) | 15 | 2.579(1.549-4.294) |
| abdominal pain upper | 577 | 5.545(5.097-6.033) | 430 | 4.632(4.203-5.105) | \ | \ | 40 | 3.177(2.319-4.355) | 242 | 3.906(3.432-4.444) |
| nausea | 1707 | 5.035(4.787-5.297) | 1848 | 5.639(5.359-5.933) | 1 | 4.366(0.559-34.113) | 184 | 3.821(3.268-4.468) | 894 | 4.236(3.948-4.545) |
| **Skin and subcutaneous tissue disorders** | | | | | | | | | | |
| photosensitivity reaction | 361 | 35.649(31.804-39.958) | 117 | 17.231(14.31-20.748) | \ | \ | 19 | 16.451(10.437-25.93) | 126 | 27.444(22.766-33.084) |
| solar dermatitis | 4 | 28.895(10.024-83.287) | 2 | 15.513(3.787-63.553) | \ | \ | \ | \ | 1 | 10.504(1.41-78.282) |
| diabetic ulcer | 8 | 7.707(3.795-15.65) | \ | \ | \ | \ | 7 | 93.374(43.614-199.904) | \ | \ |
| skin reaction | 37 | 5.119(3.69-7.101) | 15 | 2.473(1.488-4.109) | \ | \ | 9 | 11.898(6.163-22.968) | 16 | 4.12(2.511-6.761) |
| rash | 916 | 3.477(3.251-3.719) | 436 | 2.311(2.099-2.545) | 2 | 10.088(2.179-46.703) | 94 | 3.851(3.121-4.753) | 386 | 2.999(2.706-3.325) |
| rash pruritic | 92 | 3.489(2.836-4.291) | 41 | 1.966(1.446-2.674) | \ | \ | 5 | 1.699(0.706-4.09) | 54 | 3.21(2.451-4.204) |
| skin warm | 8 | 3.864(1.917-7.787) | 4 | 2.001(0.749-5.343) | \ | \ | 1 | 2.874(0.404-20.449) | 6 | 4.888(2.175-10.985) |
| rash erythematous | 63 | 3.004(2.341-3.856) | 26 | 1.844(1.254-2.712) | \ | \ | 11 | 4.69(2.589-8.496) | 37 | 3.241(2.341-4.488) |
| dermatitis exfoliative generalised | 6 | 1.722(0.77-3.849) | 4 | 2.919(1.092-7.803) | \ | \ | 3 | 11.338(3.639-35.323) | 6 | 2.638(1.179-5.903) |
| **Nintedanib** | **Gender** | | | | **Age** | | | | | |
| **Gastrointestinal disorders** | **male** | **ROR (95% CI)** | **female** | **ROR (95% CI)** | **≤18** | **ROR (95% CI)** | **18<n<65** | **ROR (95% CI)** | **≥65** | **ROR (95% CI)** |
| faeces soft | 87 | 45.437(36.406-56.71) | 29 | 28.295(19.551-40.95) | \ | \ | 24 | 48.134(31.97-72.471) | 80 | 36.395(28.814-45.969) |
| large intestinal haemorrhage | 15 | 23.029(13.702-38.706) | 4 | 13.837(5.161-37.097) | \ | \ | \ | \ | 15 | 14.057(8.369-23.611) |
| diarrhoea haemorrhagic | 38 | 18.739(13.535-25.943) | 26 | 23.136(15.673-34.152) | 1 | 148.393(18.703-1177.378) | 4 | 6.021(2.253-16.094) | 48 | 26.31(19.564-35.383) |
| diarrhoea | 2067 | 19.201(18.207-20.249) | 1419 | 22.087(20.644-23.63) | 1 | 6.434(0.815-50.798) | 488 | 17.435(15.621-19.459) | 2081 | 18.224(17.238-19.266) |
| gastrointestinal sounds abnormal | 19 | 17.292(10.93-27.357) | 10 | 14.711(7.879-27.468) | \ | \ | 5 | 15.699(6.497-37.934) | 19 | 18.046(11.349-28.696) |
| flatulence | 190 | 15.487(13.374-17.934) | 114 | 15.283(12.667-18.438) | \ | \ | 47 | 16.505(12.324-22.105) | 196 | 15.111(13.058-17.486) |
| intestinal haemorrhage | 20 | 13.174(8.441-20.563) | 10 | 16.772(8.978-31.333) | \ | \ | 2 | 8.989(2.237-36.115) | 21 | 11.087(7.166-17.154) |
| haemorrhoidal haemorrhage | 16 | 11.51(7.004-18.915) | 11 | 17.169(9.459-31.16) | \ | \ | 4 | 15.54(5.798-41.656) | 17 | 8.213(5.068-13.307) |
| faeces discoloured | 70 | 12.364(9.739-15.697) | 42 | 15.613(11.495-21.206) | \ | \ | 25 | 24.305(16.32-36.198) | 65 | 8.282(6.464-10.612) |
| discoloured vomit | 1 | 2.801(0.392-20.006) | 5 | 32.641(13.419-79.399) | \ | \ | 1 | 16.776(2.338-120.374) | 5 | 8.403(3.454-20.448) |
| **Skin and subcutaneous tissue disorders** | | | | | | | | | | |
| ephelides | 5 | 54.384(21.509-137.503) | \ | \ | \ | \ | \ | \ | 5 | 64.676(24.579-170.187) |
| solar lentigo | 6 | 27.413(12.023-62.503) | 4 | 17.887(6.661-48.03) | \ | \ | 2 | 18.91(4.687-76.288) | 7 | 37.202(16.948-81.66) |
| subcutaneous emphysema | 4 | 11.006(4.081-29.679) | 1 | 10.49(1.465-75.129) | \ | \ | \ | \ | 5 | 15.335(6.239-37.689) |
| blood blister | 2 | 2.428(0.605-9.748) | 8 | 20.356(10.113-40.974) | \ | \ | 1 | 7.472(1.047-53.323) | 4 | 4.422(1.647-11.874) |
| skin depigmentation | \ | \ | 4 | 15.782(5.882-42.343) | \ | \ | \ | \ | 4 | 14.689(5.381-40.098) |
| skin haemorrhage | 9 | 2.846(1.477-5.483) | 6 | 3.44(1.543-7.672) | \ | \ | \ | \ | 10 | 3.697(1.981-6.902) |

# Table.S5 Disproportionality analysis of reporting region based on Top 10 PTs for Gastrointestinal disorders and Skin and subcutaneous tissue disorders.

| **Pirfenidone** | **Reporting region** | | | | | | | |
| --- | --- | --- | --- | --- | --- | --- | --- | --- |
| **Gastrointestinal disorders** | **US** | **ROR (95% CI)** | **CA** | **ROR (95% CI)** | **JP** | **ROR (95% CI)** | **DE** | **ROR (95% CI)** |
| dyspepsia | 682 | 7.959(7.367-8.598) | 67 | 15.225(11.76-19.712) | 2 | 183.817(42.559-793.929) | 682 | 1.172(0.164-8.372) |
| gastric disorder | 404 | 7.064(6.393-7.804) | 18 | 9.089(5.66-14.597) | \ | \ | 404 | 30.906(13.5-70.751) |
| abdominal discomfort | 1066 | 5.639(5.3-6) | 60 | 4.862(3.716-6.362) | 1 | 29.936(4.017-223.087) | 1066 | 3.209(1.025-10.047) |
| gastrooesophageal reflux disease | 364 | 4.92(4.431-5.462) | 24 | 4.724(3.133-7.124) | \ | \ | 364 | \ |
| chapped lips | 14 | 3.72(2.194-6.307) | 7 | 72.94(32.826-162.072) | \ | \ | 14 | \ |
| oesophageal pain | 15 | 5.72(3.428-9.546) | 2 | 7.764(1.916-31.465) | \ | \ | 15 | \ |
| defaecation disorder | 3 | 7.462(2.366-23.536) | 1 | 40.381(5.242-311.086) | \ | \ | 3 | \ |
| eructation | 57 | 3.526(2.714-4.581) | 3 | 7.326(2.336-22.979) | \ | \ | 57 | \ |
| abdominal pain upper | 954 | 5.258(4.925-5.614) | 32 | 3.315(2.317-4.741) | \ | \ | 954 | 2.332(1.098-4.952) |
| nausea | 3286 | 4.838(4.662-5.021) | 163 | 6.071(5.057-7.289) | 3 | 8.015(2.371-27.093) | 3286 | 1.39(0.824-2.346) |
| **Skin and subcutaneous tissue disorders** | | | | | | | | |
| photosensitivity reaction | 431 | 35.845(32.377-39.683) | 24 | 27.267(17.927-41.473) | 4 | 567.876(188.836-1707.74) | 431 | 25.913(12.643-53.112) |
| solar dermatitis | 9 | 73.895(35.08-155.66) | \ | \ | \ | \ | 9 | \ |
| diabetic ulcer | 1 | 1.001(0.14-7.135) | \ | \ | \ | \ | 1 | 2373.733(490.537-11486.613) |
| skin reaction | 24 | 2.529(1.691-3.782) | 6 | 7.197(3.201-16.184) | \ | \ | 24 | 21.949(10.228-47.101) |
| rash | 1274 | 3.087(2.917-3.268) | 55 | 3.145(2.379-4.157) | 3 | 8.832(2.613-29.857) | 1274 | 1.525(0.628-3.701) |
| rash pruritic | 119 | 2.857(2.383-3.424) | 1 | 0.423(0.059-3.013) | \ | \ | 119 | 3.532(0.493-25.309) |
| skin warm | 6 | 1.774(0.794-3.96) | \ |  | \ | \ | 6 | \ |
| rash erythematous | 61 | 2.391(1.858-3.078) | 17 | 10.995(6.75-17.91) | \ | \ | 61 | 8.262(1.145-59.614) |
| dermatitis exfoliative generalised | \ | \ | \ | \ | \ | \ | \ | \ |
|  |  |  |  |  |  |  |  |  |
| **Nintedanib** | **Reporting region** | | | | | | | |
| **Gastrointestinal disorders** | **US** | **ROR (95% CI)** | **CA** | **ROR (95% CI)** | **JP** | **ROR (95% CI)** | **DE** | **ROR (95% CI)** |
| faeces soft | 45 | 33.214(24.65-44.753) | 47 | 38.649(28.377-52.639) | 18 | 29.609(18.044-48.587) | \ | \ |
| large intestinal haemorrhage | \ |  | 2 | 42.532(9.809-184.416) | 3 | 6.384(2.023-20.151) | \ | \ |
| diarrhoea haemorrhagic | 30 | 31.993(22.219-46.067) | 28 | 27.561(18.647-40.735) | \ | \ | 30 | 3.687(0.913-14.899) |
| diarrhoea | 2287 | 23.033(21.865-24.265) | 471 | 30.936(26.652-35.908) | 189 | 7.392(6.313-8.657) | 2287 | 6.793(5.358-8.613) |
| gastrointestinal sounds abnormal | 14 | 14.477(8.536-24.555) | 12 | 40.326(22.12-73.515) | \ | \ | 14 | \ |
| flatulence | 213 | 17.13(14.925-19.662) | 81 | 24.931(19.672-31.596) | \ | \ | 213 | \ |
| intestinal haemorrhage | 11 | 26.343(14.465-47.976) | 5 | 13.339(5.448-32.658) | \ | \ | 11 | 5.209(1.659-16.349) |
| haemorrhoidal haemorrhage | 23 | 21.922(14.49-33.166) | 2 | 5.691(1.405-23.046) | \ | \ | 23 | \ |
| faeces discoloured | 71 | 17.377(13.724-22.003) | 31 | 18.006(12.466-26.009) | 1 | 0.907(0.127-6.474) | 71 | \ |
| discoloured vomit | 4 | 37.532(13.819-101.938) | 1 | 7.22(0.996-52.334) | \ | \ | 4 | \ |
| **Skin and subcutaneous tissue disorders** | | | | | | | | |
| ephelides | \ | \ | 5 | 604.991(144.319-2536.145) | \ | \ | \ | \ |
| solar lentigo | 4 | 12.8(4.772-34.338) | 4 | 40.274(14.299-113.432) | \ | \ | 4 | \ |
| subcutaneous emphysema | 2 | 28.416(6.963-115.971) | \ | \ | 2 | 7.965(1.941-32.693) | 2 | \ |
| blood blister | 9 | 12.763(6.609-24.647) | 1 | 11.646(1.588-85.421) | \ | \ | 9 | \ |
| skin depigmentation | 4 | 12.311(4.59-33.018) | \ | \ | \ | \ | 4 | \ |
| skin haemorrhage | 14 | 5.43(3.209-9.187) | \ | \ | \ | \ | 14 | \ |

# Table.S6. Baseline characteristics of 10 RCTs

| **Study, year** | **NCT** | **Patients** | **Phase** | **Period (weeks)** | **Arm** | **Treatment** | **Numbers** | **Outcomes** |
| --- | --- | --- | --- | --- | --- | --- | --- | --- |
| INPULSIS-1, 2014 | NCT01335464 | IPF | III | 52 | 1 | Nintedanib 150mg Bid | 309 | FVC、SGRQ score、DLCO、SpO2 |
|  |  |  |  |  | 2 | placebo | 204 |
| INPULSIS-2, 2014 | NCT01335477 | IPF | III | 52 | 1 | Nintedanib 150mg Bid | 329 | FVC、SGRQ score、DLCO、SpO2 |
|  |  |  |  |  | 2 | placebo | 219 |
| TOMORROW，2011 | NCT00514683 | IPF | II | 52 | 1 | Nintedanib 50 qd | 86 | FVC、SGRQ score、DLCO、SpO2、6-MWT、TGV、VC |
|  |  |  |  |  | 2 | Nintedanib 50 Bid | 86 |
|  |  |  |  |  | 3 | Nintedanib 100 Bid | 86 |
|  |  |  |  |  | 4 | Nintedanib 150 Bid | 85 |
|  |  |  |  |  | 5 | Placebo | 85 |
| Lancaster, 2020 | NCT01979952 | IPF | III | 26 | 1 | Nintedanib 150mg Bid | 56 | FVC、SGRQ score、6MWT、HRCT QLF score 、DLCO |
|  |  |  |  |  | 2 | Placebo | 57 |
| ASCEND，2014 | NCT01366209 | IPF | III | 52 | 1 | Pirfenidone 2403 mg/ day | 278 | %FVC、6-MWT、PFS、FVC、 |
|  |  |  |  |  | 2 | Placebo | 277 |
| Huang, 2015 | NCT01504334 | IPF | II | 48 | 1 | Pirfenidone 200mg 3 times/day | 38 | FVC、6MWT、SGRQ、SpO2 |
|  |  |  |  |  | 2 | Placebo | 38 |
| CAPACITY 004 ，2011 | NCT00287716 | IPF | III | 72 | 1 | Pirfenidone 1197 mg/day | 87 | FVC、6MWT、SGRQ、SpO2 in 6MWT、DLCO |
|  |  |  |  |  | 2 | Pirfenidone 2403 mg/day | 174 |
|  |  |  |  |  | 3 | Placebo | 174 |
| CAPACITY 006，2011 | NCT00287729 | IPF | III | 72 | 1 | Pirfenidone 2403 mg/day | 171 | FVC、6MWT、SGRQ、SpO2 in 6MWT、DLCO |
|  |  |  |  |  | 2 | Placebo | 173 |
| Taniguchi, 2010 | JPICRN: JAPICCTI-050121 | IPF | III | 52 | 1 | Pirfenidone 1800 mg/day | 108 | VC、PFS time、TLC、DLCO、 PaO2 |
|  |  |  |  |  | 2 | Pirfenidone 1200 mg/day | 55 |
|  |  |  |  |  | 3 | Placebo | 104 |
| Azuma, 2005 | \ | IPF | II | 39 | 1 | Pirfenidone 1800 mg/day | 72 | VC、6MET、 SpO2 in 6MET、TLC、 DlCO、PaO2 |
|  |  |  |  |  | 2 | Placebo | 35 |

FVC, Forced Vital Capacity; SGRQ, Saint-George's Respiratory Questionnaire; DLCO, Carbon Monoxide Diffusion Capacity; SpO2, Oxygen saturation on pulse oximetry; 6MWT, 6-min walk test; TGV, Thoracic gas volume; VC, Vital Capacity; HRCT QLF, High Resolution Computerized Tomography (HRCT) Quantitative Lung Fibrosis; 6MET, 6-min walk test; JPICRN：Japan Pharmaceutical Information Center Registration Number; PFS time, Progression-free survival time; TLC, Total Lung Capacity; PaO2, Arterial oxygen partial pressure

# Table.S7 Patient demographics and clinical characteristics of RCTs

| **Study, year** | **Total**  **number** | **Current/former**  **smoker (%)** | **Primary endpoints** | **Arm** | **Age** | **Male（%）** | **Efficacy metric used in meta-analysis** |
| --- | --- | --- | --- | --- | --- | --- | --- |
| INPULSIS-1[14], 2014 | 513 | 391(76.2) | The annual rate of decline in forced vital capacity (FVC) | 1 | 66.9±8.4 | 251 (81.2) | The change from baseline in FVC、Number of patients FVC decline ≥10 % predicted |
|  |  | 2 | 66.9±8.2 | 163 (79.9) |
| INPULSIS-2[14]、, 2014 | 548 | 374(68.2) | The annual rate of decline in forced vital capacity (FVC) | 1 | 66.4±7.9 | 256 (77.8) | The change from baseline in FVC、Number of patients FVC decline ≥10 % predicted |
|  |  | 2 | 67.1±7.5 | 171 (78.1) |
| TOMORROW[15]，2011 | 428 | NA | The annual rate of  decline in FVC | 1 | 65.3±9.4 | 65 (75.6) | The change from baseline in FVC、Number of patients FVC decline ≥10 % predicted |
|  | 2 | 64.9±8.5 | 62 (72.1) |
|  | 3 | 65.1±8.6 | 65 (75.6) |
|  | 4 | 65.4±7.8 | 65 (76.5) |
|  | 5 | 64.8±8.6 | 63 (74.1) |
| Lancaster[16], 2020 | 113 | 82(72.7) | The relative change from baseline in QLF score (%) at month 6 | 1 | 68.8 ±7.6 | 45 (80.4) | The change from baseline in FVC、Number of patients FVC decline ≥10 % predicted |
|  |  | 2 | 66.2 ±9.4 | 37 (64.9) |
| ASCEND[17]，2014 | 555 | 353(63.6) | The change from baseline to week 52 in the percentage  of the predicted FVC | 1 | 68.4±6.7 | 222 (79.9) | Number of patients FVC decline ≥10 % predicted |
|  |  | 2 | 67.8±7.3 | 213 (76.9) |
| Huang[18], 2015 | 76 | 65(86.7) | The change in FVC from baseline to week 48, and the change in the maximal  distance on the 6MWT and the change in the lowest SPO2  during the 6MWT from baseline to week 48 | 1 | 59.03±5.94 | 33(86.84) | The change from baseline in FVC |
|  |  | 2 | 61.61±6.39 | 38(100.00) |
| CAPACITY 004[19] ，2011 | 435 | 301(69.19) | The change in percentage of  predicted FVC from baseline to week 72 | 1 | 68.0±7.6 | 65 (75%) | Number of patients FVC decline ≥10 % predicted |
|  |  | 2 | 65.7±8.2 | 118 (68%) |
|  |  | 3 | 66.3±7.5 | 128 (74%) |
| CAPACITY 006[19]，2011 | 344 | 221(64.24) | The change in percentage of  predicted FVC from baseline to week 72 | 1 | 66.8±7.9 | 123 (72%) | Number of patients FVC decline ≥10 % predicted |
|  |  | 2 | 67.0±7.8 | 124 (72%) |
| Taniguchi[20], 2010 | 267 | 212(79.4) | The lowest SpO2 during the  6MET | 1 | 65.4±6.2 | 85 (78.7) | The change from baseline in VC、Number of patients FVC decline ≥10 % predicted |
|  |  | 2 | 63.9±7.5 | 47 (85.5) |
|  |  | 3 | 64.7±7.3 | 81 (77.9) |
| Azuma[21], 2005 | 107 | 97(90.7) | The change in the lowest SpO2 during a 6-minute steady-state exercise test (6MET) | 1 | 64.0±7.1 | 62 (86%) | The change from baseline in VC |
|  |  | 2 | 64.3 ±7.6 | 33 (94%) |

# Fig.S1. Literature screening process and results.

# Fig. S2. Summary of risk of bias appraisal of 10 RCTs.

**
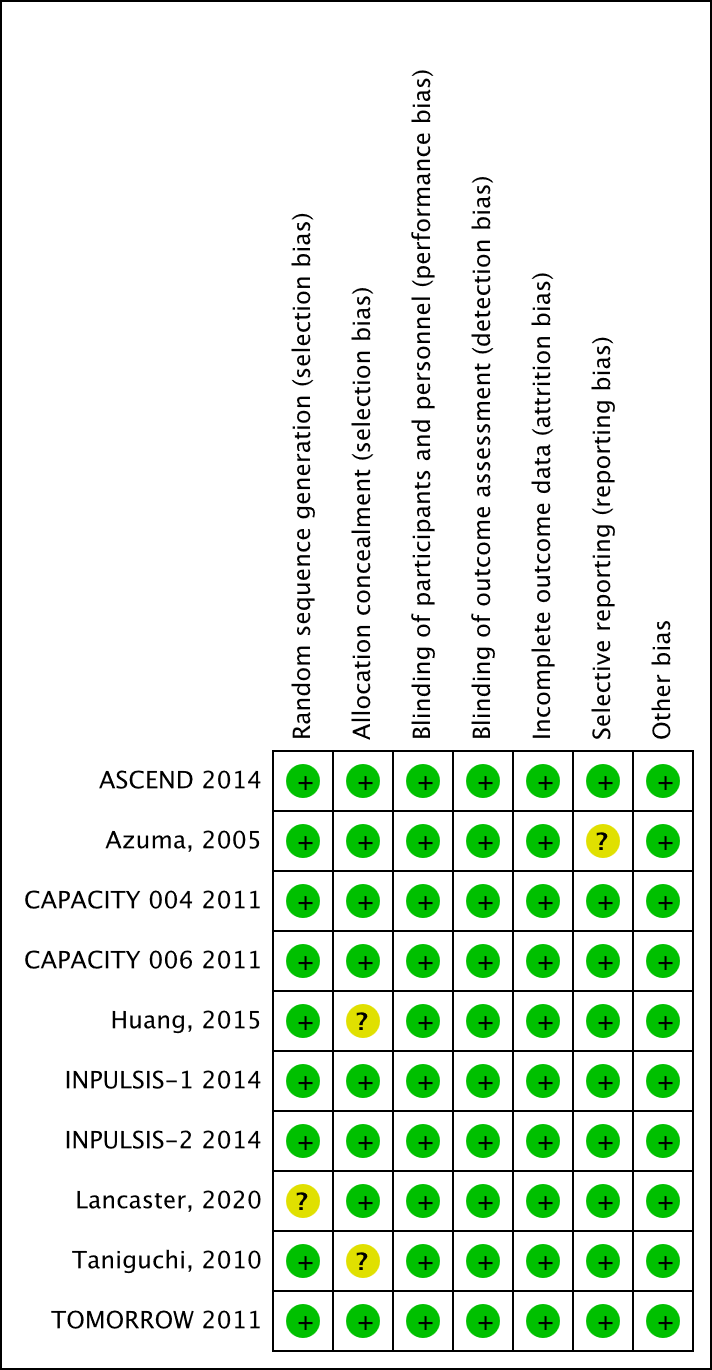
**

# Fig. S3. Meta-analysis results of the change from baseline in FVC of subgroup analysis of Pirfenidone and Nintedanib

**
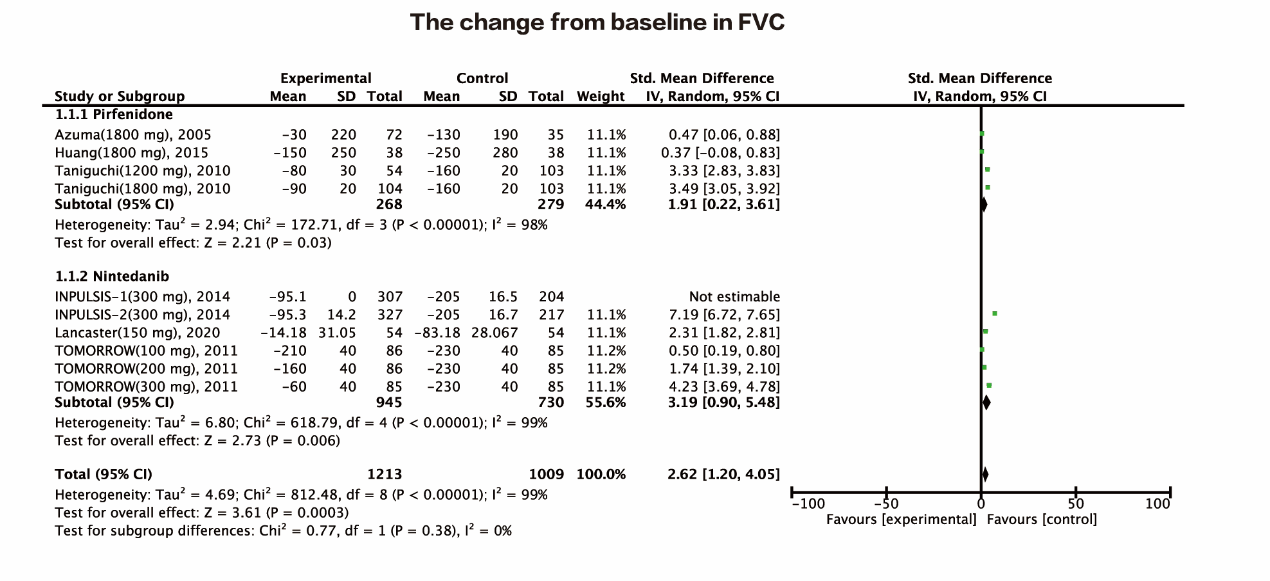
**
